# Supplementary material for: Peripheral B cells from patients with hepatitis C virus-associated lymphoma exhibit clonal expansion and an anergic-like transcriptional profile
Source: PubMed Central journal article supplement (PMC9813790; doi:10.1016/j.isci.2022.105801), 2022-12-15
Supplement: mmc1.pdf [file mmc1.pdf]

**Supplemental information**

**Peripheral B cells from patients with hepatitis C  
virus-associated lymphoma exhibit clonal expansion  
and an anergic-like transcriptional profile**

**Amanda N. Henning, Myagmarjav Budeebazar, Delgerbat Boldbaatar, Dahgwahdorj Yagaanbuyant, Davaadorj Duger, Khishigjargal Batsukh, Huizhi Zhou, Ryan Baumann, Robert D. Allison, Harvey J. Alter, Naranjargal Dashdorj, and Valeria De Giorgi**

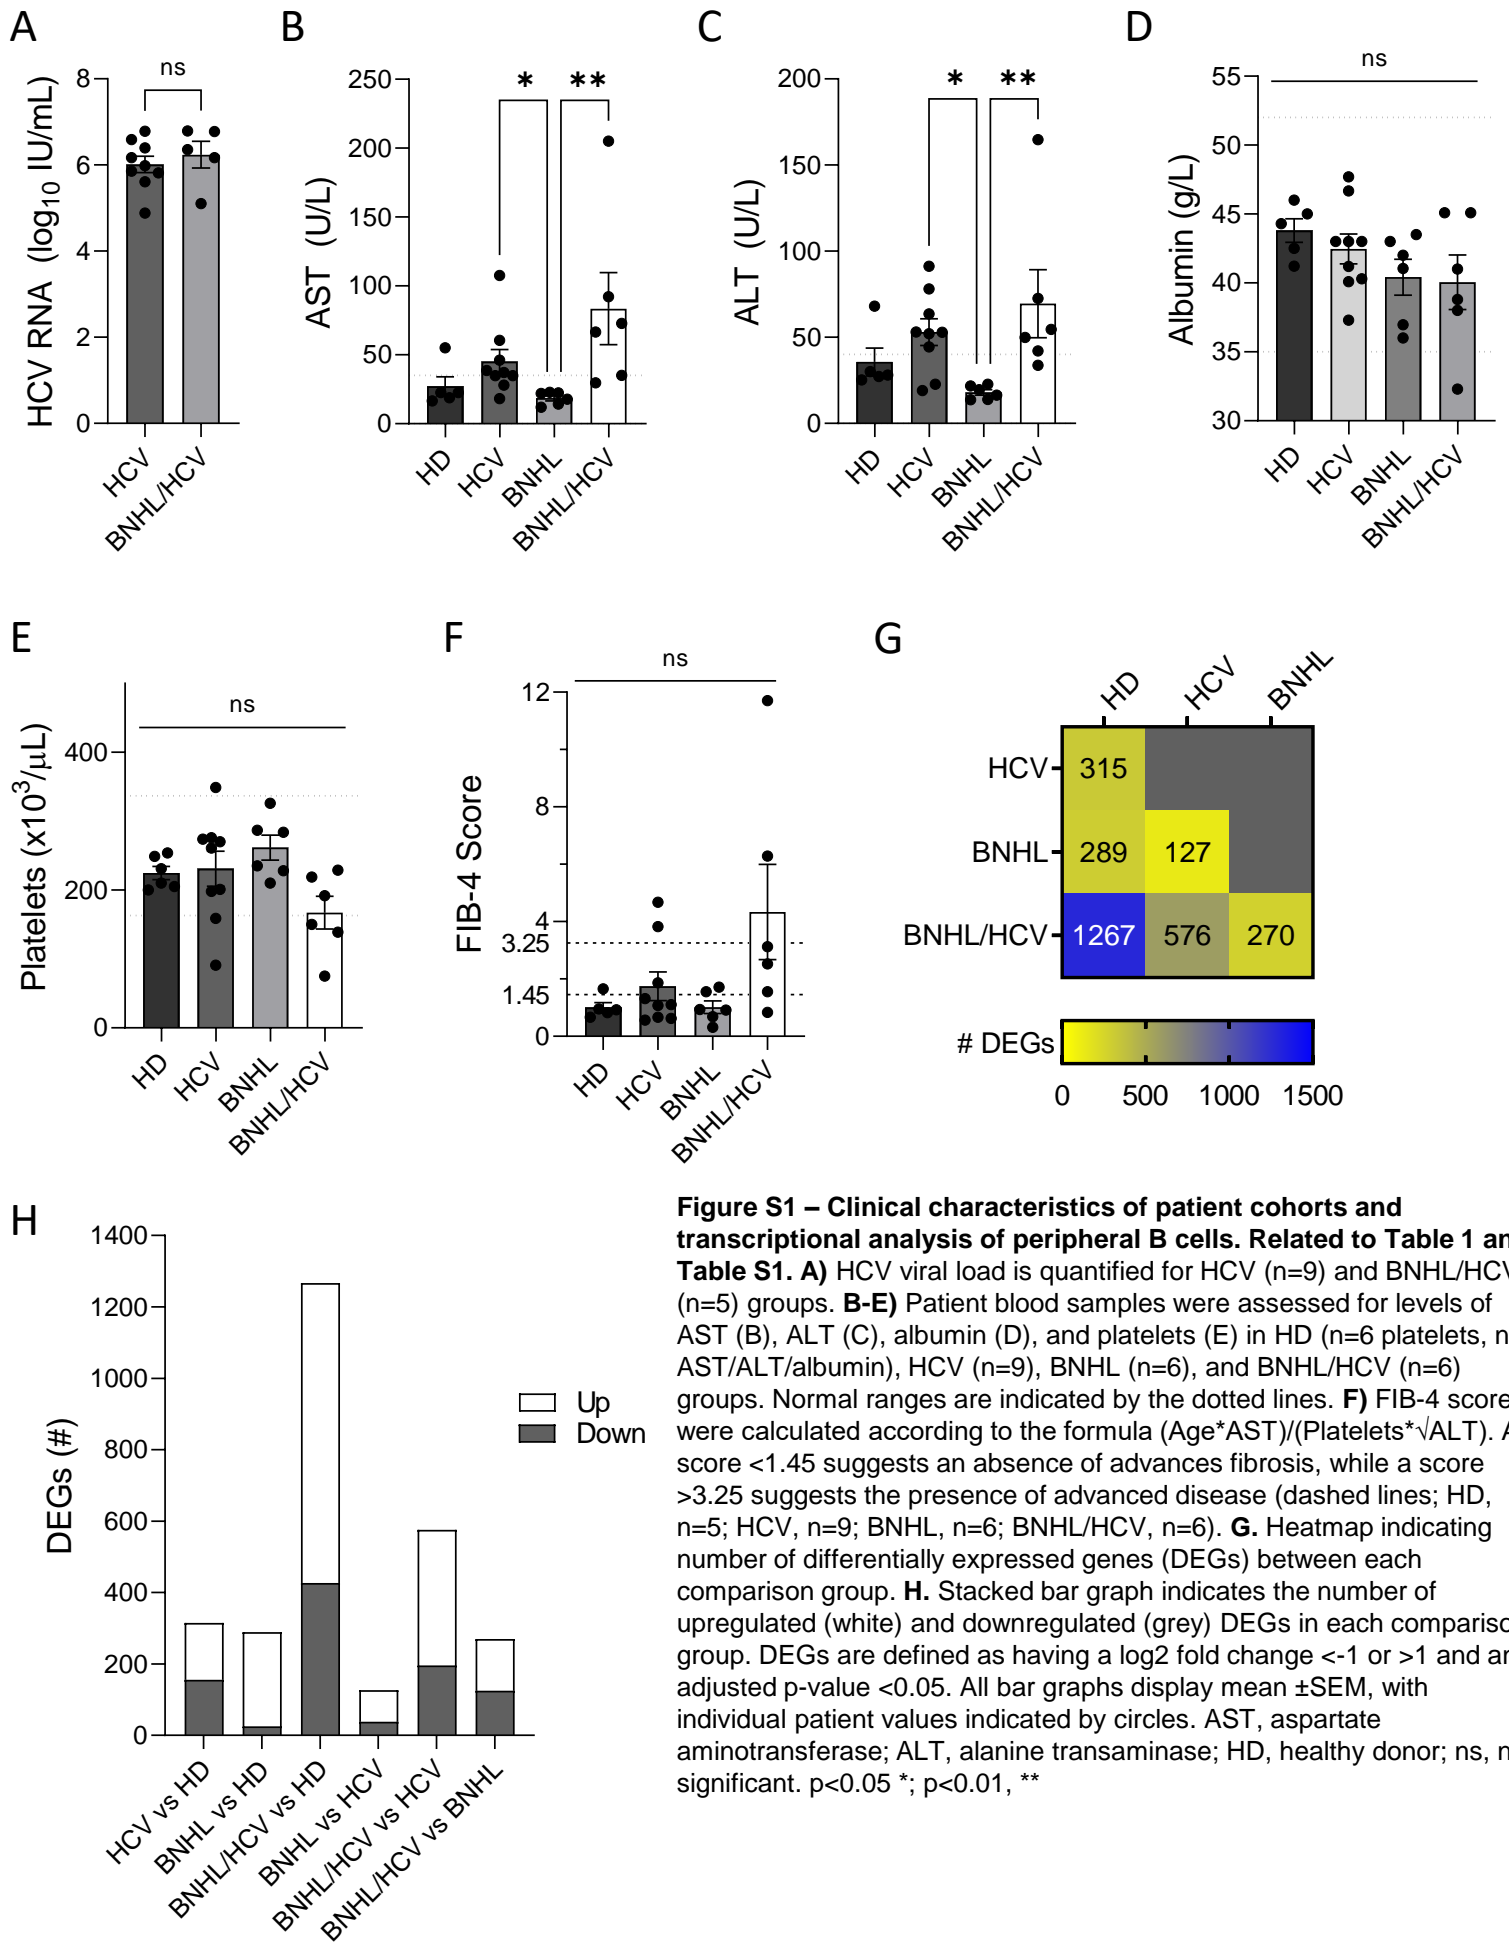

**Figure S1 – Clinical characteristics of patient cohorts and transcriptional analysis of peripheral B cells. Related to Table 1 and Table S1. A)** HCV viral load is quantified for HCV (n=9) and BNHL/HCV (n=5) groups. **B-E)** Patient blood samples were assessed for levels of AST (B), ALT (C), albumin (D), and platelets (E) in HD (n=6 platelets, n=5 AST/ALT/albumin), HCV (n=9), BNHL (n=6), and BNHL/HCV (n=6) groups. Normal ranges are indicated by the dotted lines. **F)** FIB-4 scores were calculated according to the formula  $(\text{Age} \times \text{AST}) / (\text{Platelets} \times \sqrt{\text{ALT}})$ . A score  $< 1.45$  suggests an absence of advanced fibrosis, while a score  $> 3.25$  suggests the presence of advanced disease (dashed lines; HD, n=5; HCV, n=9; BNHL, n=6; BNHL/HCV, n=6). **G.** Heatmap indicating number of differentially expressed genes (DEGs) between each comparison group. **H.** Stacked bar graph indicates the number of upregulated (white) and downregulated (grey) DEGs in each comparison group. DEGs are defined as having a  $\log_2$  fold change  $< -1$  or  $> 1$  and an adjusted p-value  $< 0.05$ . All bar graphs display mean  $\pm$  SEM, with individual patient values indicated by circles. AST, aspartate aminotransferase; ALT, alanine transaminase; HD, healthy donor; ns, not significant.  $p < 0.05$  \*;  $p < 0.01$ , \*\*



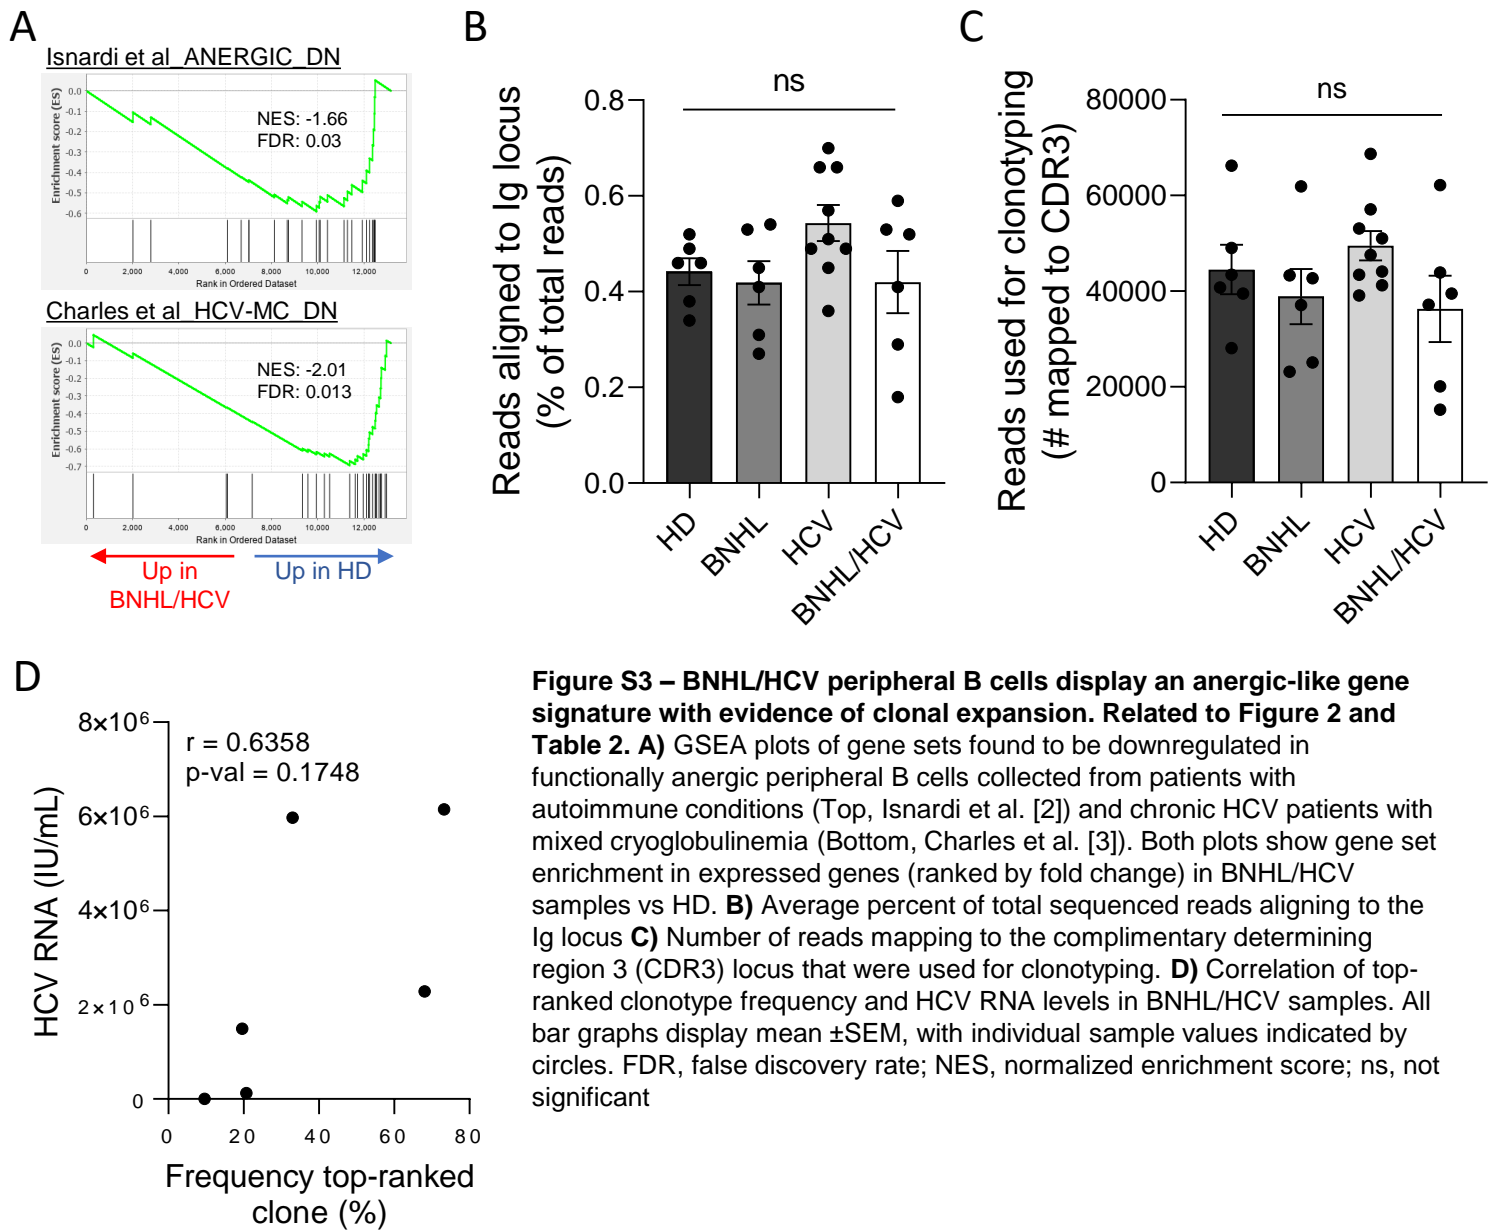

**Figure S3 – BNHL/HCV peripheral B cells display an anergic-like gene signature with evidence of clonal expansion. Related to Figure 2 and Table 2.** **A)** GSEA plots of gene sets found to be downregulated in functionally anergic peripheral B cells collected from patients with autoimmune conditions (Top, Isnardi et al. [2]) and chronic HCV patients with mixed cryoglobulinemia (Bottom, Charles et al. [3]). Both plots show gene set enrichment in expressed genes (ranked by fold change) in BNHL/HCV samples vs HD. **B)** Average percent of total sequenced reads aligning to the Ig locus **C)** Number of reads mapping to the complementary determining region 3 (CDR3) locus that were used for clonotyping. **D)** Correlation of top-ranked clonotype frequency and HCV RNA levels in BNHL/HCV samples. All bar graphs display mean  $\pm$  SEM, with individual sample values indicated by circles. FDR, false discovery rate; NES, normalized enrichment score; ns, not significant

**Gene set name/description**

GRAHAM\_CML\_DIVIDING\_VS\_N  
ORMAL\_QUIESCENT\_UP

ROSTY\_CERVICAL\_CANCER\_P  
ROLIFERATION\_CLUSTER

CHIANG\_LIVER\_CANCER\_SUBC  
LASS\_PROLIFERATION\_UP

ZHAN\_MULTIPLE\_MYELOMA\_  
PR\_UP

Genes upregulated in dividing vs  
quiescent CD34+ cells from CML  
patients

Genes in HPV+ cervical cancer  
positively correlated with E6/E7  
expression

Genes upregulated in a proliferative  
subclass of HCV+ HCC

Genes upregulated in cluster of MM  
characterized by increased expr of  
proliferation/cell cycle genes

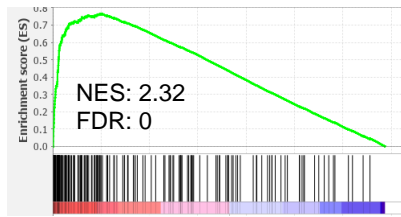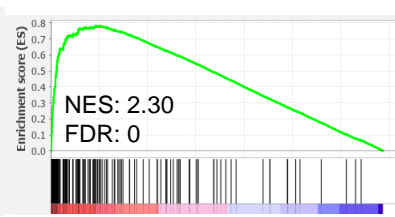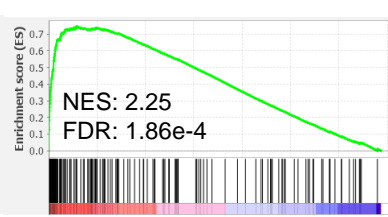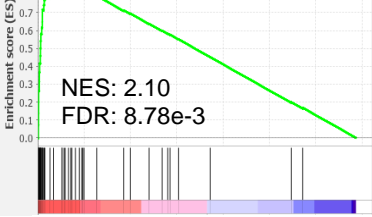

Up in BNHL/HCV

Up in HCV

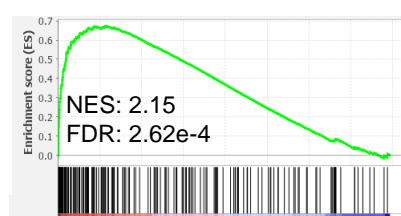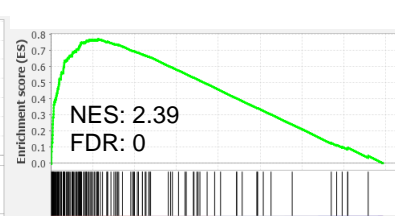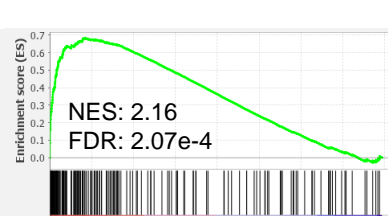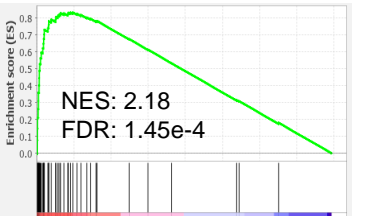

Up in BNHL/HCV

Up in BNHL

**Figure S4 – BNHL/HCV peripheral B cells demonstrate an enhanced proliferative signature. Related to Figure 3.** GSEA plots for expressed genes (ranked by fold change) in BNHL/HCV vs HCV (top) and BNHL (bottom) comparisons. Significant gene sets shown come from the GSEA Molecular Signatures Database C2 collection, and all are related to proliferation-associated cancers. Gene set names are listed above the plot, along with a brief description. FDR, false discovery rate; NES, normalized enrichment score

## Supplemental References:

1. Bolen, C.R., Robek, M.D., Brodsky, L., Schulz, V., Lim, J.K., Taylor, M.W., and Kleinstein, S.H. (2013). The blood transcriptional signature of chronic hepatitis C virus is consistent with an ongoing interferon-mediated antiviral response. *J Interferon Cytokine Res* 33, 15-23.
2. Isnardi, I., Ng, Y.S., Menard, L., Meyers, G., Saadoun, D., Srdanovic, I., Samuels, J., Berman, J., Buckner, J.H., Cunningham-Rundles, C., et al. (2010). Complement receptor 2/CD21- human naive B cells contain mostly autoreactive unresponsive clones. *Blood* 115, 5026-5036.
3. Charles, E.D., Brunetti, C., Marukian, S., Ritola, K.D., Talal, A.H., Marks, K., Jacobson, I.M., Rice, C.M., and Dustin, L.B. (2011). Clonal B cells in patients with hepatitis C virus-associated mixed cryoglobulinemia contain an expanded anergic CD21<sup>low</sup> B-cell subset. *Blood* 117, 5425-5437.
